# Supplementary material for: Proton transfer and autoionization in HNO3·HCl·(H2O)n particles
Source: Royal Society of Chemistry journal article supplement (doi:10.1039/c1cp22322d), 2011-01-01
Supplement: c1cp22322d.pdf [file c1cp22322d.pdf]

## SUPPLEMENTARY INFORMATION

All clusters given in the main text have been optimized at the MP2/aug-cc-pVDZ level and the structural and spectroscopic results are presented in Table S1. The labeling of atoms is given in the main text.

**Table S1.** The MP2/aug-cc-pVDZ level calculation results for  $\text{HNO}_3 \cdot \text{HCl} \cdot (\text{H}_2\text{O})_n$ , with  $n=1$  to 6. The frequencies, Freq, in  $\text{cm}^{-1}$  and IR intensities, I,  $\text{km/Mole}$ .

| System                         | Bond distances of $\text{HNO}_3$ (Å)                           | Bond distances of $\text{H}_2\text{O}$ (Å)                                          | Bond distances of $\text{HCl}$ (Å) | Bond distances of $\text{H}_3\text{O}^+$ (Å) | Freqs/I                                                                                                                                                                                                                                     |
|--------------------------------|----------------------------------------------------------------|-------------------------------------------------------------------------------------|------------------------------------|----------------------------------------------|---------------------------------------------------------------------------------------------------------------------------------------------------------------------------------------------------------------------------------------------|
| Monomer $\text{HNO}_3$         | 0.977 O-H<br>1.416 N-O<br>1.222 N-O2<br>1.211 N-O3             | -                                                                                   | -                                  | -                                            | 878/207 N-O<br>1320/196 $\text{NO}_2$ sym<br>1348/107 NOH bend<br>1861/258 $\text{NO}_2$ asym<br>3704/90 O-H                                                                                                                                |
| Monomer $\text{HCl}$           | -                                                              | -                                                                                   | 1.29                               | -                                            | 3023/42 H-Cl                                                                                                                                                                                                                                |
| Monomer $\text{H}_2\text{O}$   | -                                                              | 0.965 O-H                                                                           | -                                  | -                                            | 1622/67 $\text{H}_2\text{O}$ bend<br>3803/4 $\text{H}_2\text{O}$ sym<br>3937/64 $\text{H}_2\text{O}$ asym                                                                                                                                   |
| Monomer $\text{H}_3\text{O}^+$ | -                                                              | -                                                                                   | -                                  | 0.982 O-H                                    | 905/416 $\text{H}_3\text{O}^+$ umbrella<br>1669/94 $\text{H}_3\text{O}^+$ bend<br>1670/94 $\text{H}_3\text{O}^+$ bend<br>3550/34 $\text{H}_3\text{O}^+$ sym<br>3678/459 $\text{H}_3\text{O}^+$ asym<br>3679/460 $\text{H}_3\text{O}^+$ asym |
| NC1W-1                         | 1.00 O-H<br>1.37 N-O<br>1.23 N-O2<br>1.21 N-O3<br>1.94 O2...H3 | 0.97 O1-H1<br>0.97 O1-H2<br>1.68 O1...H                                             | 1.30 H3-Cl                         | -                                            | 2865/433 H3-Cl<br>3195/1214 O-H                                                                                                                                                                                                             |
| NC1W-2                         | 1.00 O-H<br>1.40 N-O<br>1.22 N-O2<br>1.21 N-O3                 | 0.97 O1-H1<br>0.97 O1-H2<br>1.67 O1...H                                             | 1.30 H3-Cl                         | -                                            | 2879/265 H3-Cl<br>3139/1109 O-H                                                                                                                                                                                                             |
| NC1W-3                         | 0.99 O-H<br>1.38 N-O<br>1.23 N-O2<br>1.21 N-O3                 | 0.97 O1-H1<br>0.97 O1-H2<br>1.68 O1...H3                                            | 1.33 H3-Cl<br>2.23 H...Cl          | -                                            | 2345/1345 H3-Cl<br>3473/726 O-H                                                                                                                                                                                                             |
| NC1W-4                         | 0.98 O-H<br>1.42 N-O<br>1.22 N-O2<br>1.21 N-O3                 | 0.97 O1-H1<br>0.97 O1-H2<br>1.75 O1...H3                                            | 1.32 H3-Cl<br>2.38 H...Cl          | -                                            | 2570/965 H3-Cl<br>3562/385 O-H                                                                                                                                                                                                              |
| NC2W-1                         | 1.01 O-H<br>1.40 N-O<br>1.22 N-O2<br>1.22 N-O3                 | 0.97 O1-H1<br>0.97 O1-H2<br>0.97 O4-H4<br>0.97 O4-H5<br>1.60 O1...H<br>1.66 O4...H3 | 1.34 H3-Cl                         | -                                            | 2367/1360 H3-Cl<br>2952/1509 O-H                                                                                                                                                                                                            |

|        |                                                                |                                                                                                                 |                             |                                        |                                  |
|--------|----------------------------------------------------------------|-----------------------------------------------------------------------------------------------------------------|-----------------------------|----------------------------------------|----------------------------------|
| NC2W-2 | 1.02 O-H<br>1.36 N-O<br>1.24 N-O2<br>1.22 N-O3                 | 0.98 O1-H1<br>0.96 O1-H2<br>0.97 O4-H4<br>0.97 O4-H5<br>1.58 O1...H<br>1.87 O2...H3                             | 1.30 H3-Cl                  | -                                      | 2788/596 H3-Cl<br>2910/1690 O-H  |
| NC2W-3 | 1.02 O-H<br>1.40 N-O<br>1.22 N-O2<br>1.22 N-O3                 | 0.98 O1-H1<br>0.97 O1-H2<br>0.97 O4-H4<br>0.97 O4-H5<br>1.57 O1...H                                             | 1.31 H3-Cl                  | -                                      | 2725/782 H3-Cl<br>2852/1591 O-H  |
| NC2W-4 | 1.01 O-H<br>1.36 N-O<br>1.24 N-O2<br>1.22 N-O3                 | 0.97 O1-H1<br>0.97 O1-H2<br>0.97 O4-H3<br>0.97 O4-H4<br>1.62 O1...H<br>1.67 O4...H3                             | 1.33 H3-Cl                  | -                                      | 2407/1448 H3-Cl<br>3406/1451 O-H |
| NC2W-5 | 0.99 O-H<br>1.38 N-O<br>1.23 N-O2<br>1.21 N-O3                 | 0.98 O1-H1<br>0.97 O1-H2<br>0.97 O4-H3<br>0.96 O4-H4<br>1.57 O1...H3                                            | 1.35 H3-Cl<br>2.16 H...Cl   | -                                      | 2122/2307 H3-Cl<br>3378/775 O-H  |
| NC2W-6 | 0.99 O-H<br>1.42 N-O<br>1.22 N-O2<br>1.21 N-O3                 | 0.99 O1-H1<br>0.97 O1-H2<br>0.97 O4-H3<br>0.96 O4-H4<br>1.57 O1...H3                                            | 1.35 H3-Cl<br>2.18 H...Cl   | -                                      | 2125/2118 H3-Cl<br>3409/482 O-H  |
| NC3W-1 | 1.01 O-H<br>1.36 N-O<br>1.24 N-O2<br>1.22 N-O3                 | 0.97 O1-H1<br>0.98 O1-H2<br>0.99 O4-H4<br>0.97 O4-H5<br>0.97 O5-H6<br>0.96 O5-H7<br>1.60 O1...H<br>1.57 O4...H3 | 1.35 H3-Cl                  | -                                      | 2125/2324 H3-Cl<br>2978/1625 O-H |
| NC3W-2 | 1.04 O-H<br>1.37 N-O<br>1.23 N-O2<br>1.22 N-O3<br>1.98 O2...H3 | 0.99 O1-H1<br>0.97 O1-H2<br>0.98 O4-H4<br>0.96 O4-H5<br>0.97 O5-H6<br>0.97 O5-H7<br>1.51 O1...H                 | 1.30 H3-Cl                  | -                                      | 2598/1698 O-H<br>2900/546 H3-Cl  |
| NC3W-3 | 1.05 O-H<br>1.38 N-O<br>1.23 N-O2<br>1.22 N-O3                 | 0.98 O1-H1<br>0.98 O1-H2<br>0.97 O4-H4<br>0.97 O4-H5<br>0.97 O5-H6<br>0.96 O5-H7<br>1.47 O1...H                 | 1.30 H3-Cl                  | -                                      | 2367/2152 O-H<br>2754/759 H3-Cl  |
| NC3W-4 | 1.04 O-H<br>1.35 N-O<br>1.23 N-O2<br>1.23 N-O3                 | 0.97 O1-H1<br>0.97 O1-H2<br>0.97 O5-H6<br>0.97 O5-H7                                                            | 1.74 H3...Cl<br>1.87 H...Cl | 1.07 O4-H3<br>1.00 O4-H4<br>1.01 O4-H5 | 2582/2425 O-H                    |

|        |                                                                  |                                                                                                                                             |                              |                                                                                 |                                  |
|--------|------------------------------------------------------------------|---------------------------------------------------------------------------------------------------------------------------------------------|------------------------------|---------------------------------------------------------------------------------|----------------------------------|
| NC4W-1 | 1.03 O-H<br>1.38 N-O<br>1.22 N-O2<br>1.22 N-O3                   | 0.99 O1-H1<br>0.97 O1-H2<br>0.97 O4-H4<br>0.96 O4-H5<br>0.97 O5-H6<br>0.98 O5-H7<br>0.97 O6-H8<br>0.97 O6-H9<br>1.52 O1...H<br>1.52 O5...H3 | 1.37 H3-Cl                   | -                                                                               | 1715/1605 H3-Cl<br>2662/2040 O-H |
| NC4W-2 | 1.09 O-H<br>1.36 N-O<br>1.23 N-O2<br>1.23 N-O3                   | 0.99 O1-H1<br>0.98 O1-H2<br>0.98 O4-H4<br>0.96 O4-H5<br>0.97 O5-H6<br>0.97 O5-H7<br>0.97 O6-H8<br>0.97 O6-H9<br>1.37 O1...H                 | 1.30 H3-Cl                   | -                                                                               | 1874/2249 O-H<br>2781/558 H3-Cl  |
| NC4W-3 | 1.60 O...H<br>1.27 N-O<br>1.28 N-O2<br>1.24 N-O3<br>1.48 O2...H3 | 0.97 O4-H4<br>0.99 O4-H5<br>0.98 O5-H6<br>0.97 O5-H7<br>0.98 O6-H8<br>0.97 O6-H9                                                            | 1.38 H3-Cl                   | 1.01 O1-H<br>1.05 O1-H1<br>1.01 O1-H2                                           | 1847/1415 H3-Cl                  |
| NC4W-4 | 1.39 O...H<br>1.32 N-O<br>1.25 N-O2<br>1.23 N-O3<br>1.76 O...H3  | 0.99 O4-H4<br>0.96 O4-H5<br>0.97 O5-H6<br>0.97 O5-H7<br>0.98 O6-H8<br>0.97 O6-H9                                                            | 1.32 H3-Cl                   | 1.09 O1-H<br>1.02 O1-H1<br>1.00 O1-H2                                           | 2510/1126 H3-Cl                  |
| NC4W-5 | 1.05 O-H<br>1.36 N-O<br>1.23 N-O2<br>1.22 N-O3<br>1.94 O2...H3   | 0.99 O1-H1<br>0.97 O1-H2<br>0.99 O4-H4<br>0.96 O4-H5<br>0.98 O5-H6<br>0.97 O5-H7<br>0.97 O6-H8<br>0.96 O6-H9<br>1.48 O1...H                 | 1.30 H3-Cl                   | -                                                                               | 2457/2101 O-H<br>2846/634 H3-Cl  |
| NC5W-1 | 1.03 O-H<br>1.37 N-O<br>1.23 N-O2<br>1.22 N-O3                   | 1.00 O1-H1<br>0.97 O1-H2<br>0.99 O5-H6<br>0.97 O5-H7<br>0.97 O6-H8<br>0.98 O6-H9<br>0.97 O7-H10<br>0.97 O7-H11                              | 1.93 H3...Cl<br>1.90 H...Cl  | 1.02 O4-H3<br>1.08 O4-H4<br>0.99 O4-H5                                          | 2752/2265 O-H                    |
| NC5W-2 | 1.48 O...H<br>1.31 N-O<br>1.24 N-O2<br>1.23 N-O3                 | 0.98 O1-H1<br>0.96 O1-H2<br>0.98 O5-H5<br>0.96 O5-H6<br>0.99 O7-H10<br>0.97 O7-H11                                                          | 1.92 H3...Cl<br>1.95 H8...Cl | 1.04 O4-H<br>1.02 O4-H3<br>1.01 O4-H4<br>1.01 O6-H7<br>1.02 O6-H8<br>1.05 O6-H9 | -                                |

|      |                                                  |                                                                                                                |                               |                                                                                   |   |
|------|--------------------------------------------------|----------------------------------------------------------------------------------------------------------------|-------------------------------|-----------------------------------------------------------------------------------|---|
| NC6W | 1.43 O...H<br>1.32 N-O<br>1.25 N-O2<br>1.24 N-O3 | 0.98 O1-H1<br>0.97 O1-H2<br>0.98 O5-H5<br>0.96 O5-H6<br>0.99 O6-H7<br>0.96 O6-H8<br>0.99 O8-H12<br>0.97 O8-H13 | 1.92 H3...Cl<br>1.93 H10...Cl | 1.06 O4-H<br>1.01 O4-H3<br>1.00 O4-H4<br>1.02 O7-H9<br>1.01 O7-H10<br>1.04 O7-H11 | - |
|------|--------------------------------------------------|----------------------------------------------------------------------------------------------------------------|-------------------------------|-----------------------------------------------------------------------------------|---|

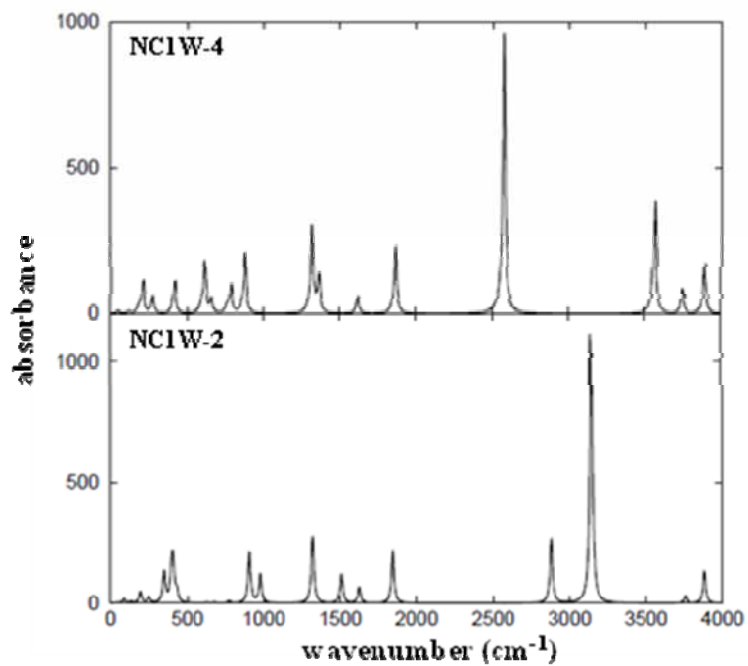

**Figure S1.** IR Spectrum of NC1W-2,4 clusters. Bands are represented by Lorentzian curves with a hwhm of 10 cm<sup>-1</sup>.

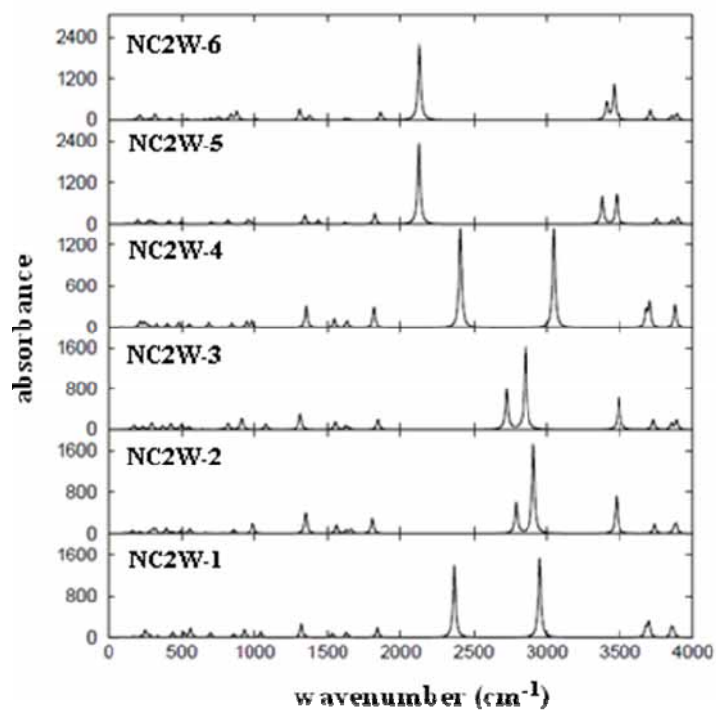

**Figure S2.** IR Spectrum of NC2W-1,2,3,4,5,6 clusters. Bands are represented by Lorentzian curves with a hwhm of 10 cm<sup>-1</sup>.

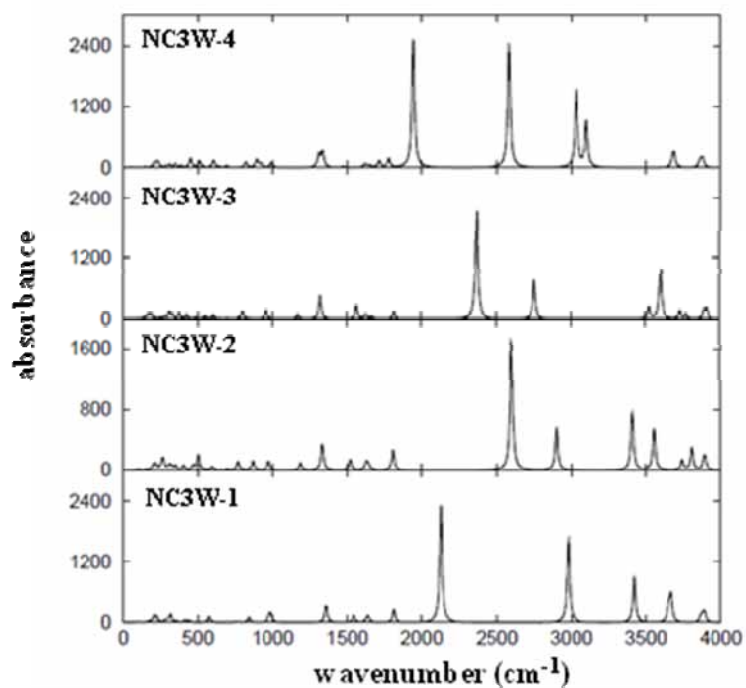

**Figure S3.** IR Spectrum of NC3W-1,2,3,4 clusters. Bands are represented by Lorentzian curves with a hwhm of 10 cm<sup>-1</sup>.

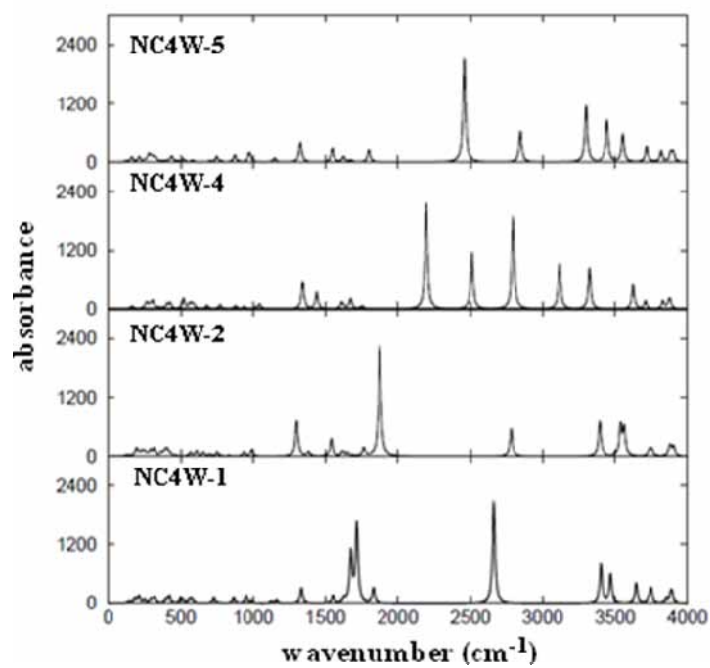

**Figure S4.** IR Spectrum of NC4W-1,2,4,5 clusters. Bands are represented by Lorentzian curves with a hwhm of 10 cm<sup>-1</sup>.



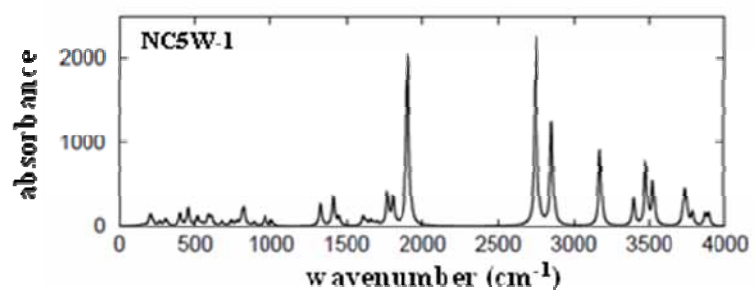

**Figure S5.** IR Spectrum of NC5W-1 cluster. Band is represented by Lorentzian curves with a hwhm of 10 cm<sup>-1</sup>.

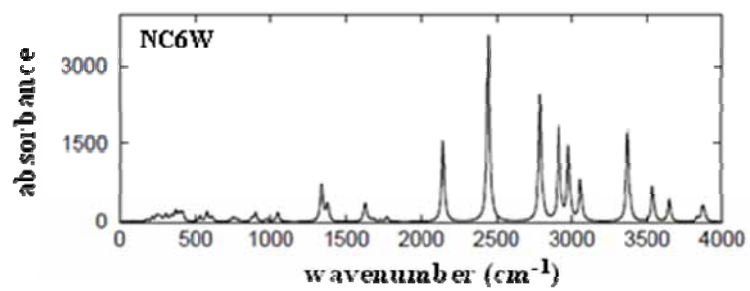

**Figure S6.** IR Spectrum of NC6W cluster. Band is represented by Lorentzian curves with a hwhm of 10 cm<sup>-1</sup>.
